# Supplementary material
Source: HighWire-hosted journal article supplement (https://erj.ersjournals.com/content/55/5/1902171)
Supplement: inline-supplementary-material-1 [file inline-supplementary-material-1.pdf]

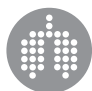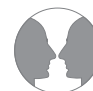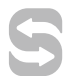

SHAREABLE PDF

# Magnetic resonance imaging of pulmonary arterial compliance after pulmonary endarterectomy

Stefano Ghio<sup>1</sup>, Gabriele Crimi<sup>1</sup>, Stefania Guida<sup>1</sup>, Adele Valentini<sup>2</sup>, Anna Celentano<sup>3</sup>, Maurizio Pin<sup>3</sup>, Claudia Raineri<sup>1</sup>, Annalisa Turco<sup>1</sup>, Laura Scelsi<sup>1</sup>, Luigi Oltrona Visconti<sup>1</sup>, Robert Naeije<sup>4</sup> and Andrea Maria D'Armini<sup>3,5</sup>

**Affiliations:** <sup>1</sup>Division of Cardiology, Fondazione IRCCS Policlinico San Matteo, Pavia, Italy. <sup>2</sup>Institute of Radiology, Fondazione IRCCS Policlinico San Matteo, Pavia, Italy. <sup>3</sup>Division of Cardiac Surgery, Fondazione IRCCS Policlinico San Matteo, Pavia, Italy. <sup>4</sup>Free University of Brussels, Brussels, Belgium. <sup>5</sup>Dept of Surgical, Clinical, Diagnostic and Pediatric Sciences, University of Pavia School of Medicine, Pavia, Italy.

**Correspondence:** Stefano Ghio, Divisione di Cardiologia, Policlinico S. Matteo, Piazza Golgi 1, 27100 Pavia, Italy. E-mail: s.ghio@smatteo.pv.it

 @ERSpublications

**In CTEPH patients who have undergone pulmonary endarterectomy, exercise capacity is better associated with changes in invasively measured pulmonary arterial compliance than with changes in magnetic resonance imaging of pulmonary artery stiffness** <http://bit.ly/30DAWUj>

**Cite this article as:** Ghio S, Crimi G, Guida S, *et al.* Magnetic resonance imaging of pulmonary arterial compliance after pulmonary endarterectomy. *Eur Respir J* 2020; 55: 1902171 [<https://doi.org/10.1183/13993003.02171-2019>].

This single-page version can be shared freely online.

## To the Editor:

Pulmonary endarterectomy (PEA) is the treatment of choice of chronic thromboembolic pulmonary hypertension (CTEPH) [1]. However, successfully operated patients may continue to suffer from dyspnoea and limitation of exercise capacity, despite improvement or even normalisation of pulmonary artery pressure (PAP), cardiac output (CO) and pulmonary vascular resistance (PVR) [2]. This absence of complete symptomatic recovery has been explained by a decreased right ventricular (RV) function reserve due to persistent increased afterload [3, 4], related to decreased pulmonary arterial compliance (PCa) more than to mildly increased PVR [5, 6]. There is therefore interest in assessing PCa in patients during the follow-up of PEA.
